# Supplementary material for: Tipping of the double-diffusive regime in the southern Adriatic Pit in 2017 in connection with record high-salinity values
Source: Copernicus journal article supplement (doi:10.5194/os-20-463-2024), 2024-03-28
Supplement: Supplementary file 1 [file os-20-463-2024-supplement.pdf]

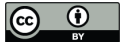

*Supplement of*

## **Tipping of the double-diffusive regime in the southern Adriatic Pit in 2017 in connection with record high-salinity values**

**Felipe L. L. Amorim et al.**

*Correspondence to:* Vanessa Cardin ([vcardin@ogs.it](mailto:vcardin@ogs.it))

The copyright of individual parts of the supplement might differ from the article licence.

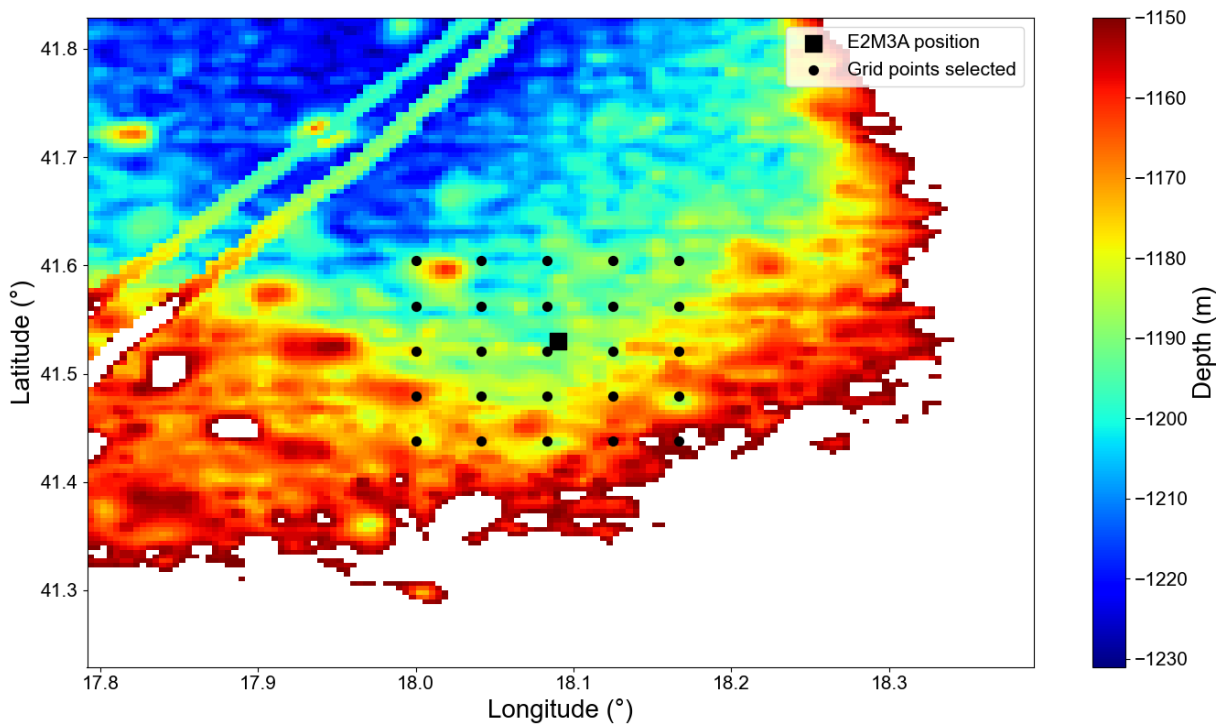

**Fig. S1:** Selected grid points near the E2M3A position used to calculate the maximum depth of the mixed layer for the entire study period.

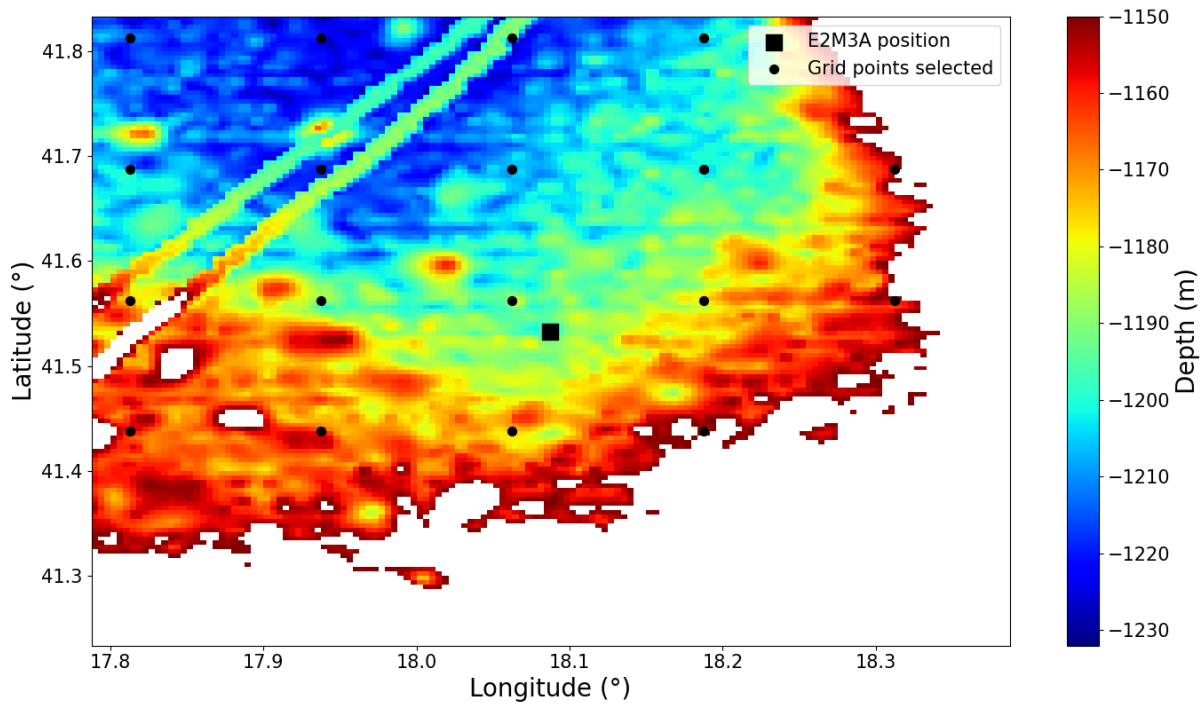

5 Fig. S2 Selected grid points near the E2M3A position used to calculate the average relative vorticity for the entire study period.

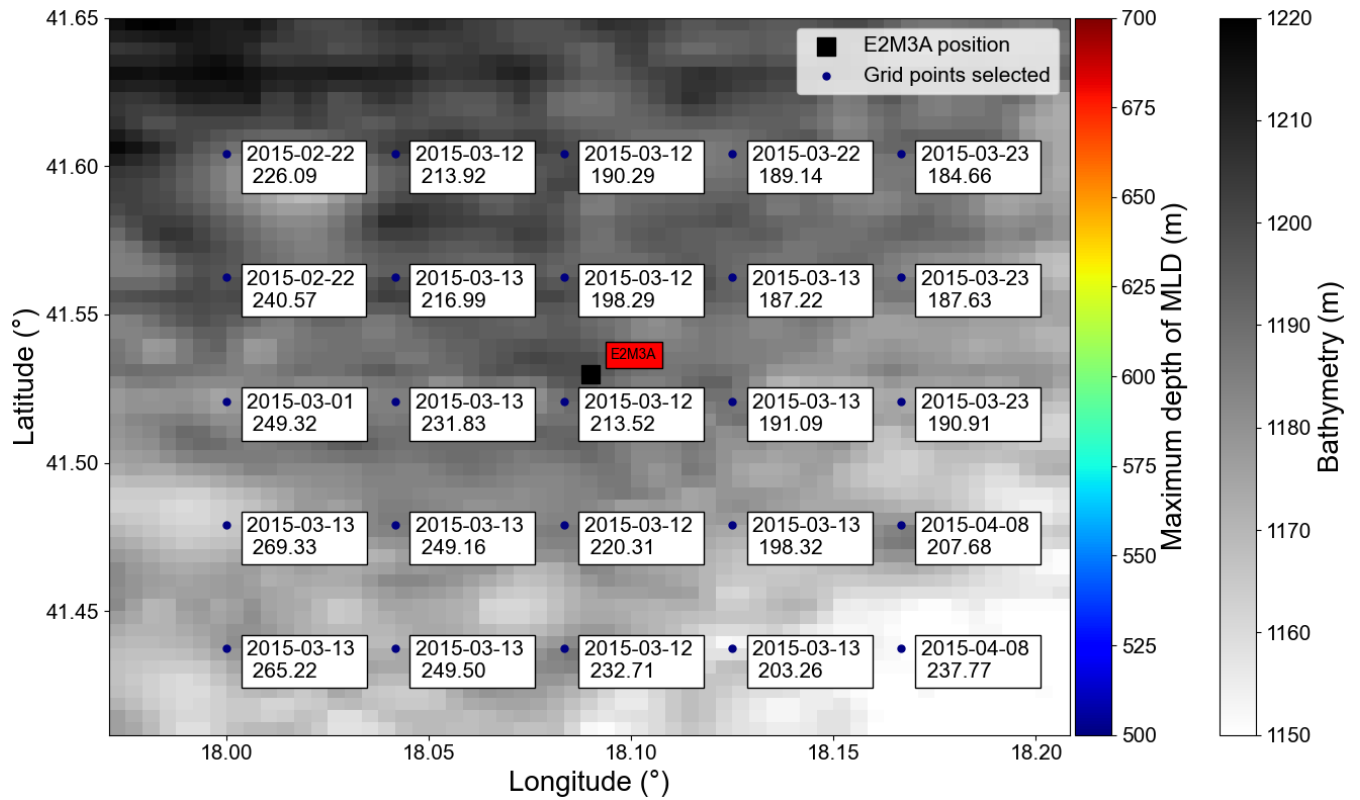

Fig. S3: Selected grid points near E2M3A location used to determine the maximum depth of the mixed layer in winter 2015, as indicated in table 1.

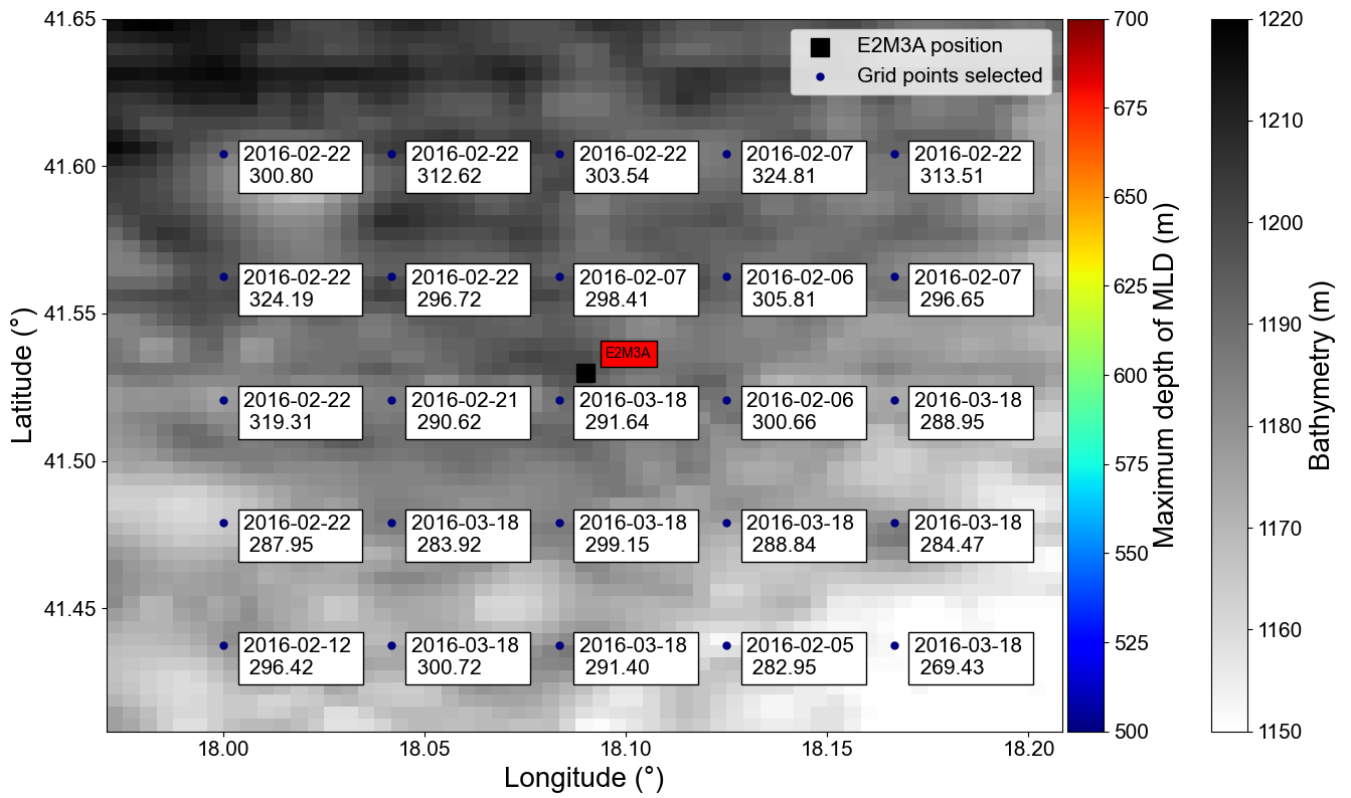

10

Fig. S4: Selected grid points near E2M3A location used to determine the maximum depth of the mixed layer in winter 2016, as indicated in table 1.

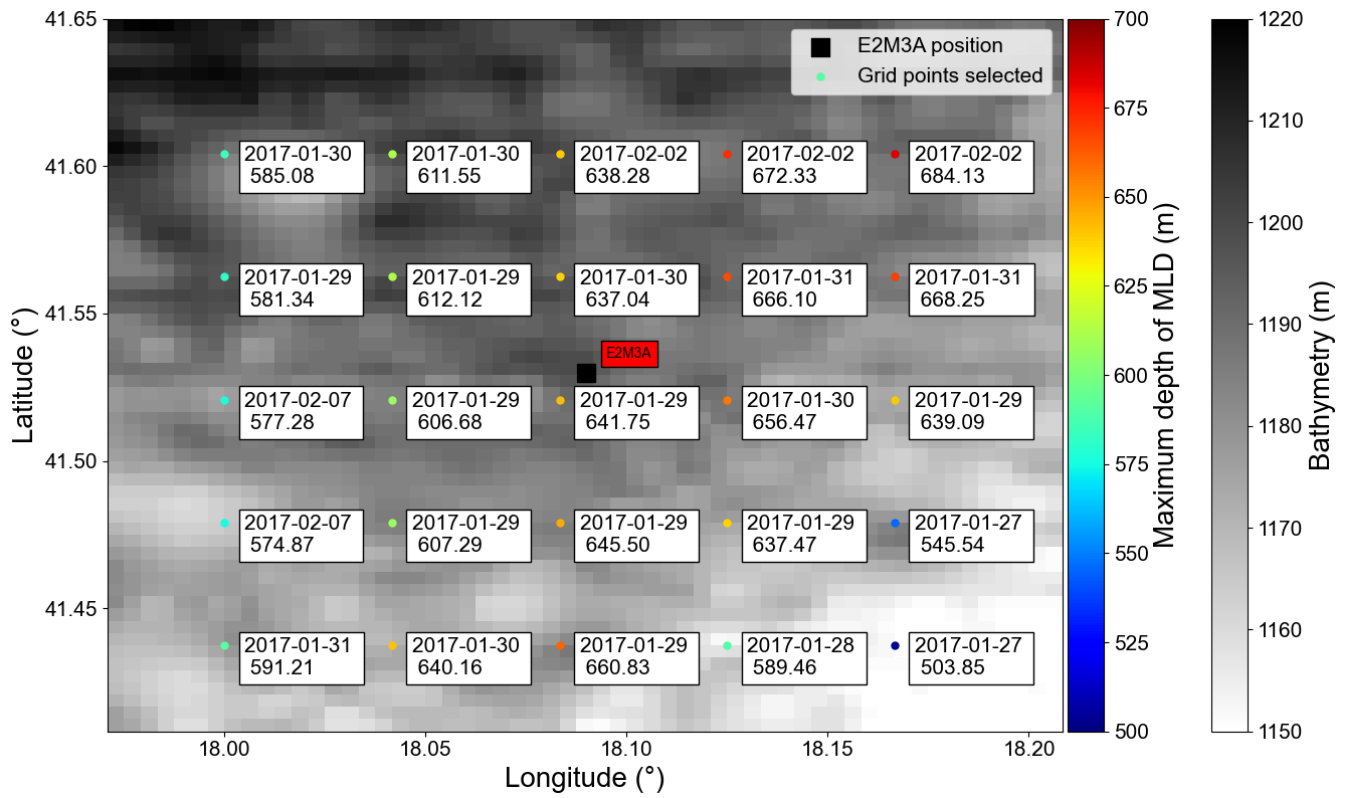

Fig. S5: Selected grid points near E2M3A location used to determine the maximum depth of the mixed layer in winter 2017, as indicated in table 1.

15

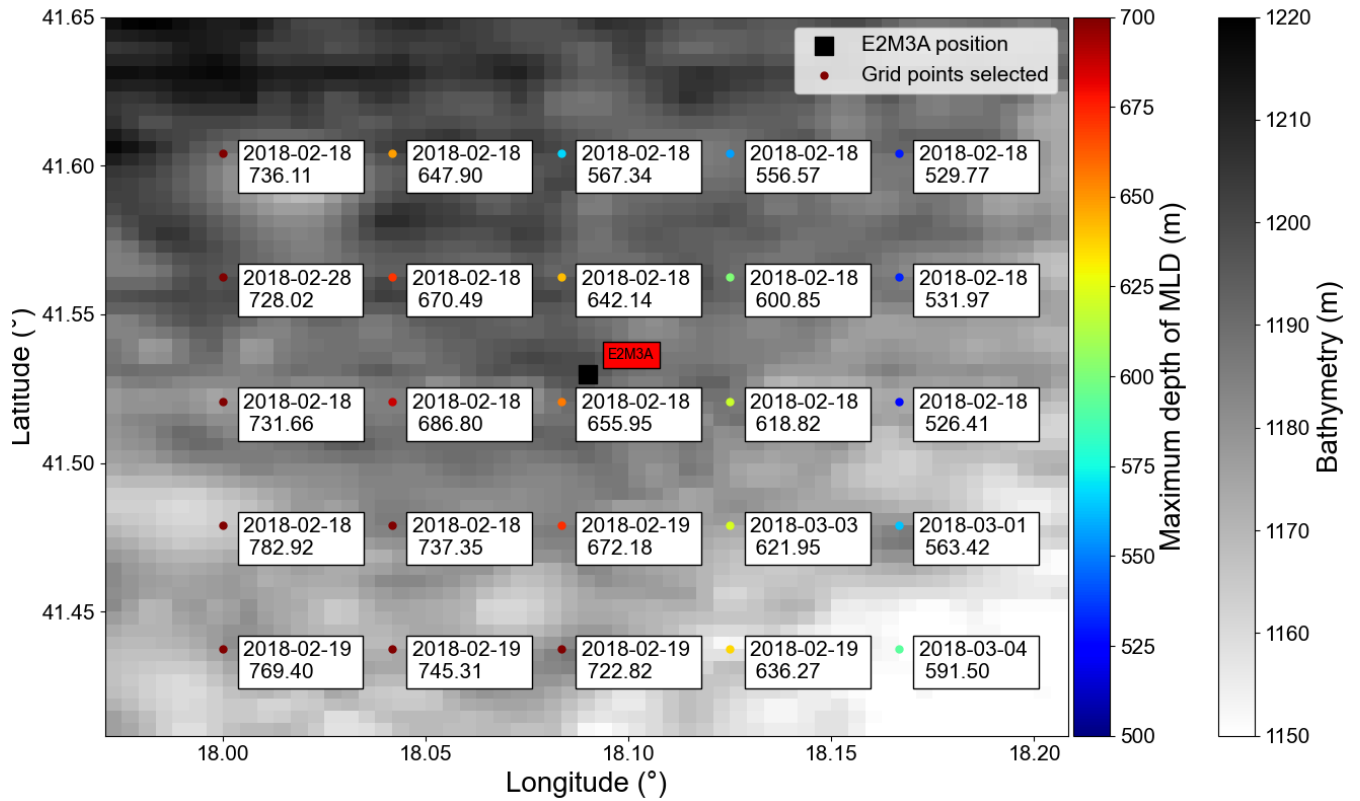

Fig. S6: Selected grid points near E2M3A location used to determine the maximum depth of the mixed layer in winter 2018, as indicated in table 1.

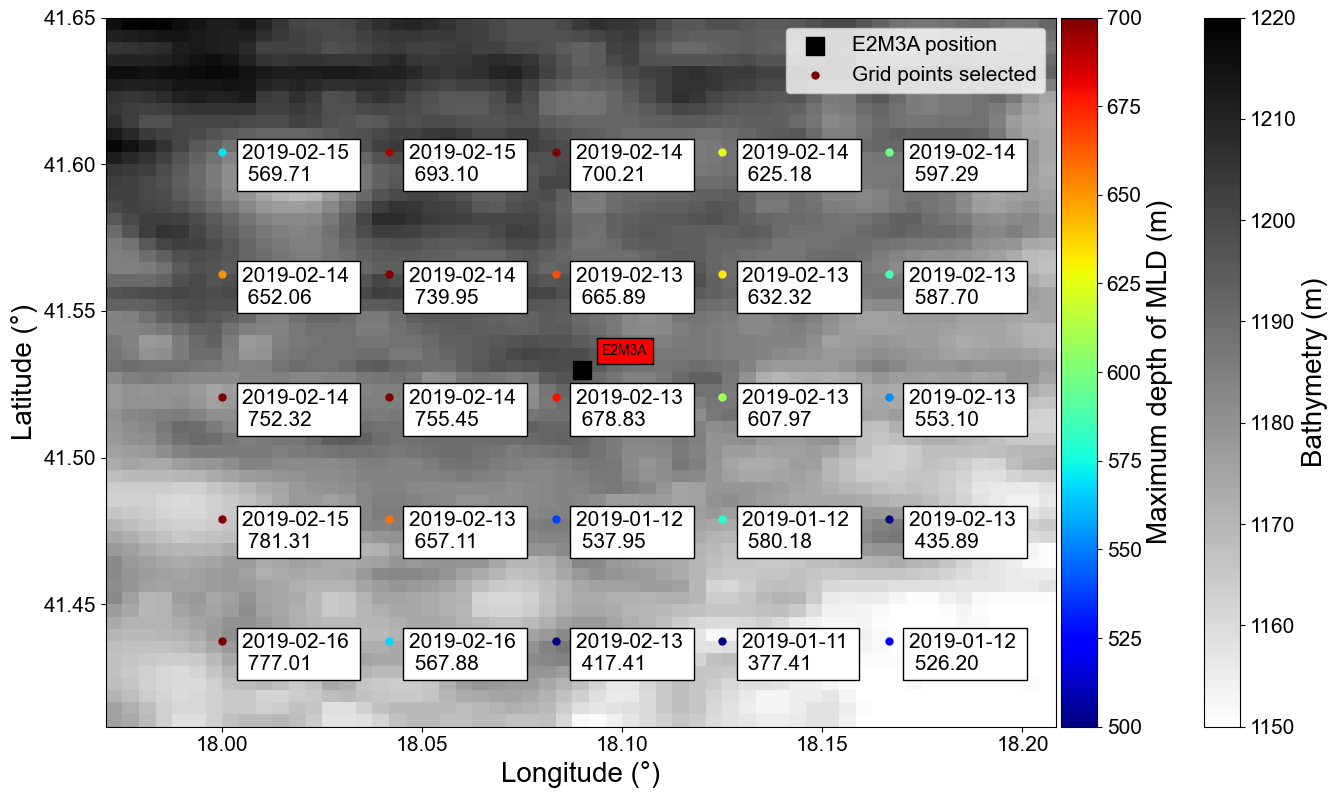

20

**Fig. S7:** Selected grid points near E2M3A location used to determine the maximum depth of the mixed layer in winter 2019, as indicated in table 1.

25
